# Supplementary material for: Morphological Effects of Au Nanoparticles on Electrochemical Sensing Platforms for Nitrite Detection
Source: MDPI journal article supplement (doi:10.3390/molecules28134934), 2023-06-23
Supplement: s1 [file s1]

## Supporting Materials

### Morphological Effects of Au Nanoparticles on Electrochemical Sensing Platforms for Nitrite Detection

Ruiqin Feng <sup>1</sup>, Ye Fan <sup>1</sup>, Yun Fang <sup>1,\*</sup>, Yongmei Xia <sup>1,2,\*</sup>

<sup>1</sup>*The Key Laboratory of Synthetic and Biological Colloids (Ministry of Education), School of Chemical and Material Engineering, Jiangnan University, Wuxi, Jiangsu 214122, P. R. China*

<sup>2</sup>*State Key Laboratory of Food Science and Technology, Jiangnan University, Wuxi, Jiangsu 214122, P. R. China*

#### Caption list

**Figure S1.** TEM of Au nanoplates growing in PVP(50 g·L<sup>-1</sup>)–SDS(5 mmol·L<sup>-1</sup>)–HAuCl<sub>4</sub>(1.0 mmol·L<sup>-1</sup>) solution.

**Figure S2.** LSPR spectra of Au nanoparticles growing in PVP(50 g·L<sup>-1</sup>)–SDS–HAuCl<sub>4</sub>(0.25 mmol·L<sup>-1</sup>) solutions with different SDS concentrations.

**Figure S3.** LSPR spectra of Au nanoparticles growing in PVP–SDS(5 mmol·L<sup>-1</sup>)–HAuCl<sub>4</sub>(0.25 mmol·L<sup>-1</sup>) solutions with different PVP concentrations.

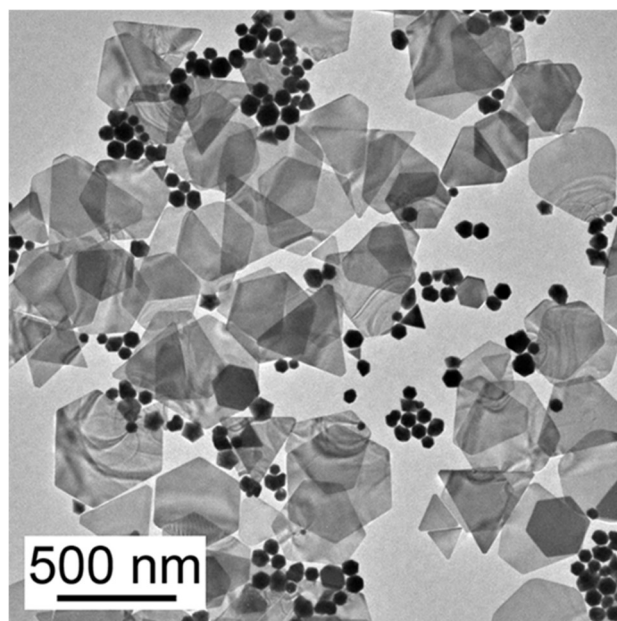

**Figure S1.** TEM of Au nanoplates growing in PVP( $50\text{ g}\cdot\text{L}^{-1}$ )–SDS( $5\text{ mmol}\cdot\text{L}^{-1}$ )–HAuCl<sub>4</sub>( $1.0\text{ mmol}\cdot\text{L}^{-1}$ ) solution.

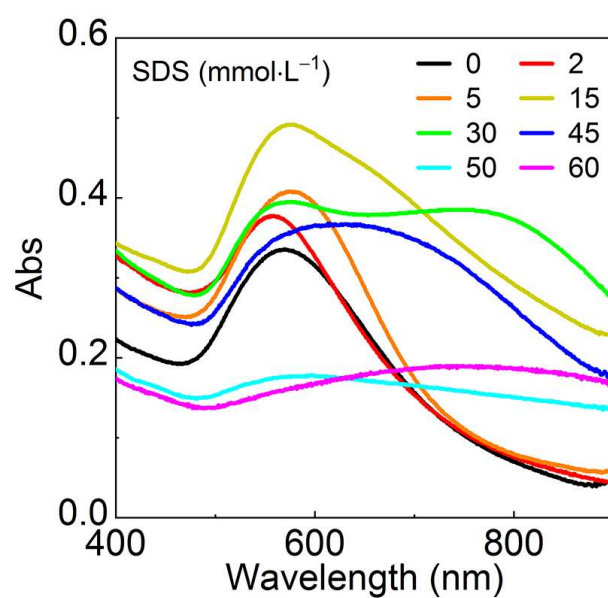

**Figure S2.** LSPR spectra of Au nanoparticles growing in PVP(50 g·L<sup>-1</sup>)–SDS–HAuCl<sub>4</sub>(0.25 mmol·L<sup>-1</sup>) solutions with different SDS concentrations.

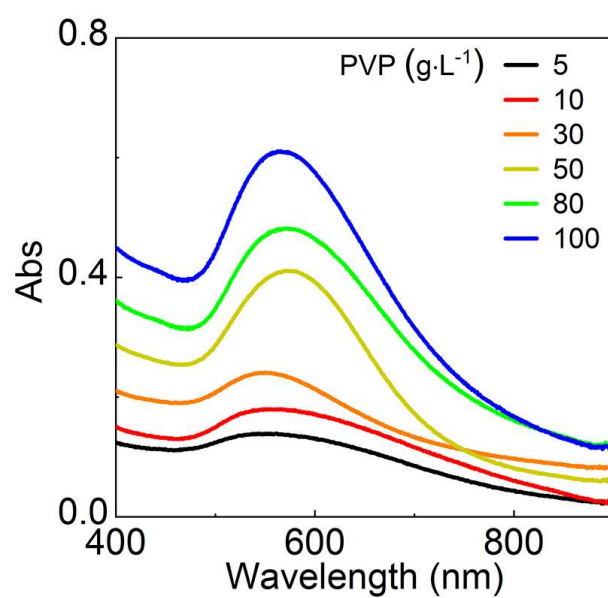

**Figure S3.** LSPR spectra of Au nanoparticles growing in PVP–SDS(5 mmol·L<sup>-1</sup>)–HAuCl<sub>4</sub>(0.25 mmol·L<sup>-1</sup>) solutions with different PVP concentrations.
